# Supplementary material for: One-pot controlled synthesis of sea-urchin shaped Bi2S3/CdS hierarchical heterostructures with excellent visible light photocatalytic activity
Source: Royal Society of Chemistry journal article supplement (doi:10.1039/c4dt01176g), 2014-01-01
Supplement: c4dt01176g1.pdf [file c4dt01176g1.pdf]

## Electronic Supplementary Information

One-pot controlled synthesis of sea-urchin shaped  $\text{Bi}_2\text{S}_3/\text{CdS}$  hierarchical heterostructures with excellent visible light photocatalytic activity

Yunhan Shi,<sup>a</sup> Yajie Chen,<sup>a</sup> Guohui Tian,<sup>\*a,b</sup> Honggang Fu,<sup>a</sup> Kai Pan,<sup>a</sup> Juan Zhou<sup>a</sup> and Haijing Yan<sup>a</sup>

<sup>a</sup> Key Laboratory of Functional Inorganic Material Chemistry, Ministry of Education of the People's Republic of China, Heilongjiang University, Harbin 150080 P. R. China,

Corresponding author E-mail: [tiangh@hlju.edu.cn](mailto:tiangh@hlju.edu.cn)

<sup>b</sup> High-efficiency Conversion, College of Heilongjiang Province, School of Chemistry and Materials Science, Heilongjiang University, Harbin 150080, China

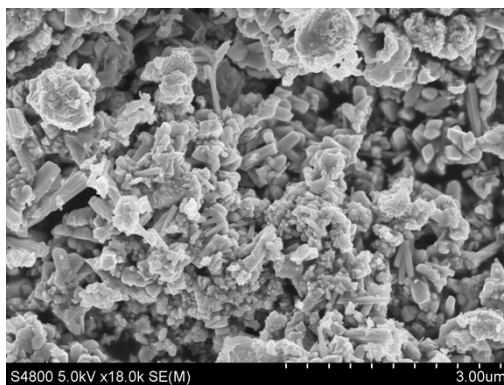

**Fig. S1** SEM image of the crushed  $\text{Bi}_2\text{S}_3/\text{CdS}$  hierarchical heterostructure composite (BC2).

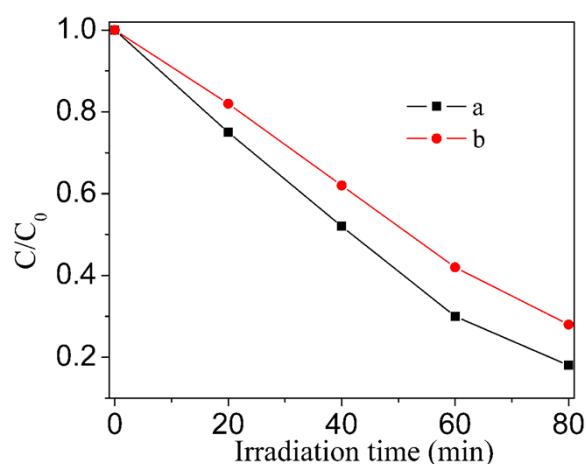

**Fig. S2** Comparison of photocatalytic degradation of RhB aqueous solutions (10 mg/L) degraded by (a) the  $\text{Bi}_2\text{S}_3/\text{CdS}$  hierarchical heterostructure composite (BC2) and (b) the crushed  $\text{Bi}_2\text{S}_3/\text{CdS}$  hierarchical heterostructure composite (BC2) under visible light irradiation.

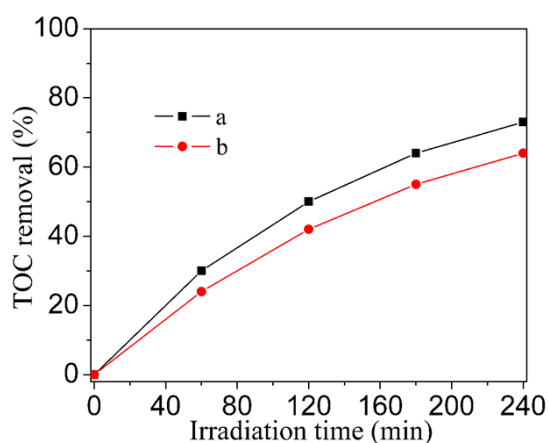

**Fig. S3** The profiles of total organic carbon (TOC) removals for the photodegradation of RhB (10 mg/L) in different aqueous catalysts under visible light irradiation, (a) the  $\text{Bi}_2\text{S}_3/\text{CdS}$  hierarchical heterostructure composite (BC2) and (b) the crushed  $\text{Bi}_2\text{S}_3/\text{CdS}$  hierarchical heterostructure composite (BC2).
